# Supplementary material for: Fabrication of two-phase Ca2+-doped LaVO4:Eu3+ structures: morphology modification, tunable optical performance and detection of Fe3+ ions with high sensitivity
Source: Royal Society of Chemistry journal article supplement (doi:10.1039/d1dt02058g), 2021-01-01
Supplement: d1dt02058g1.pdf [file d1dt02058g1.pdf]

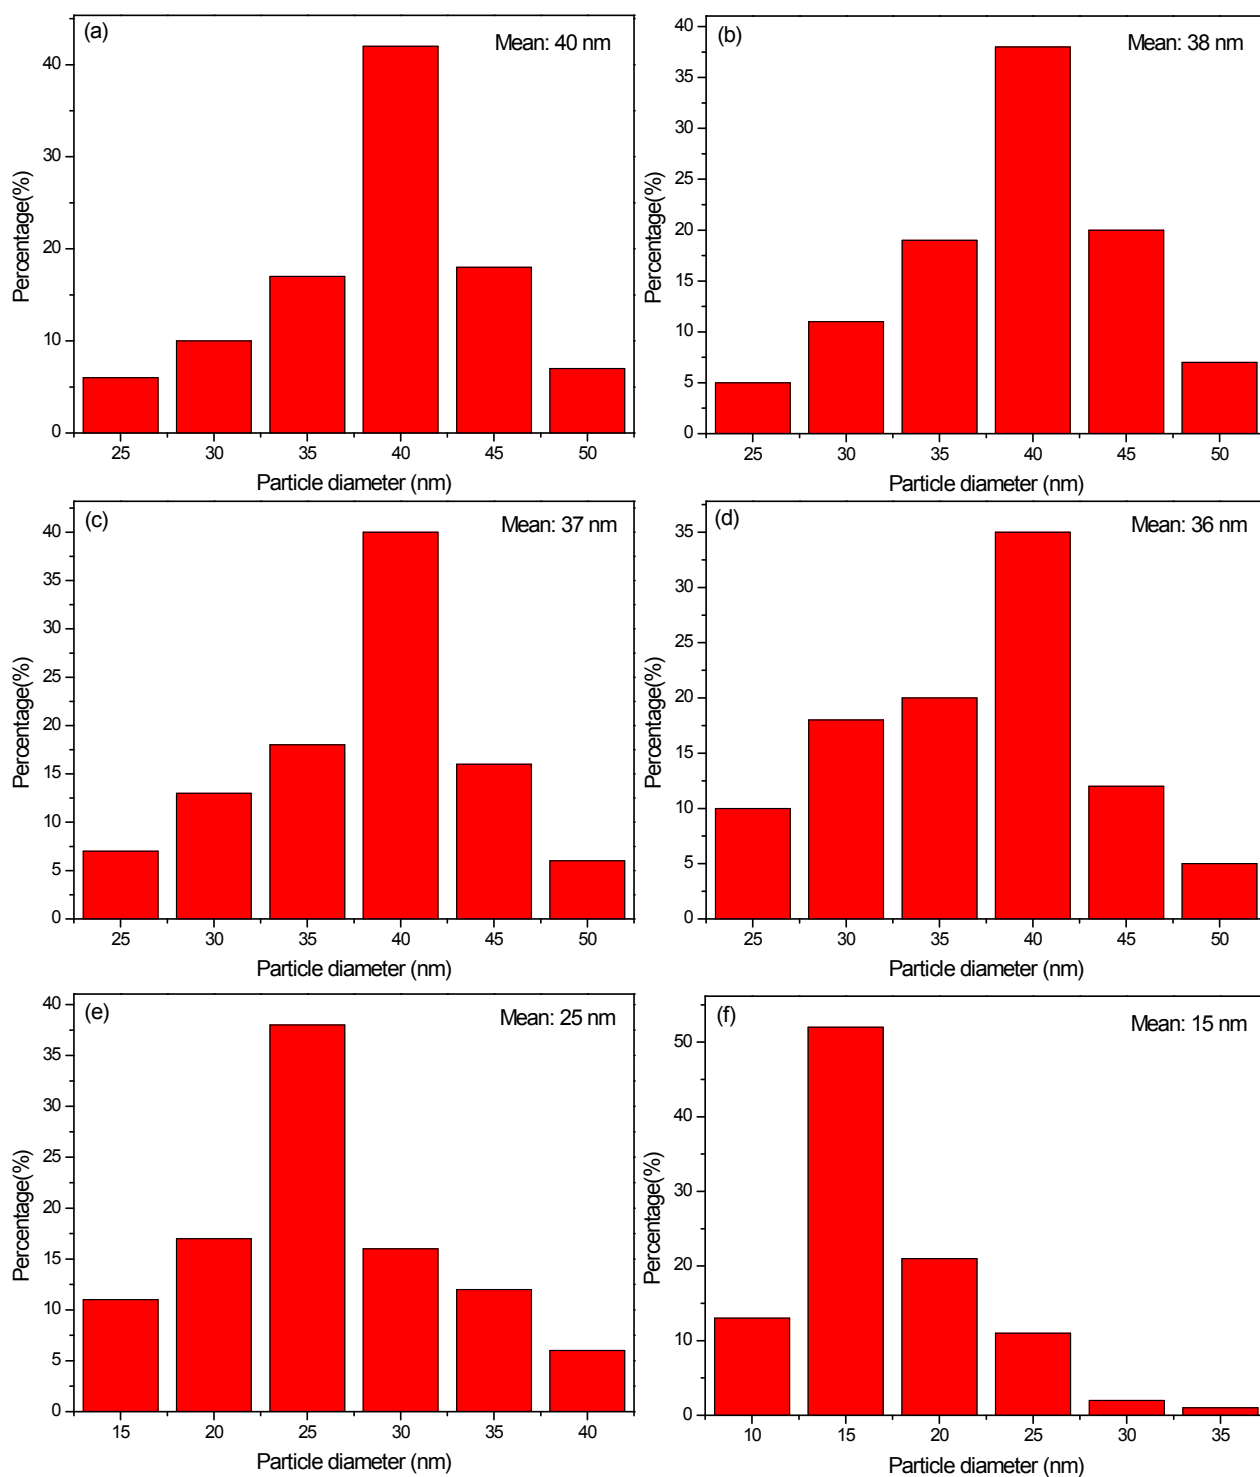

Figure S1. The histograms of size distribution corresponding to  $m\text{-(La}_{0.95-x}\text{Ca}_x\text{Eu}_{0.05})\text{VO}_4$  samples: (a)  $x=0$ , (b)  $x=0.03$ , (c)  $x=0.06$ , (d)  $x=0.09$ , (e)  $x=0.12$  and (f)  $x=0.15$ .

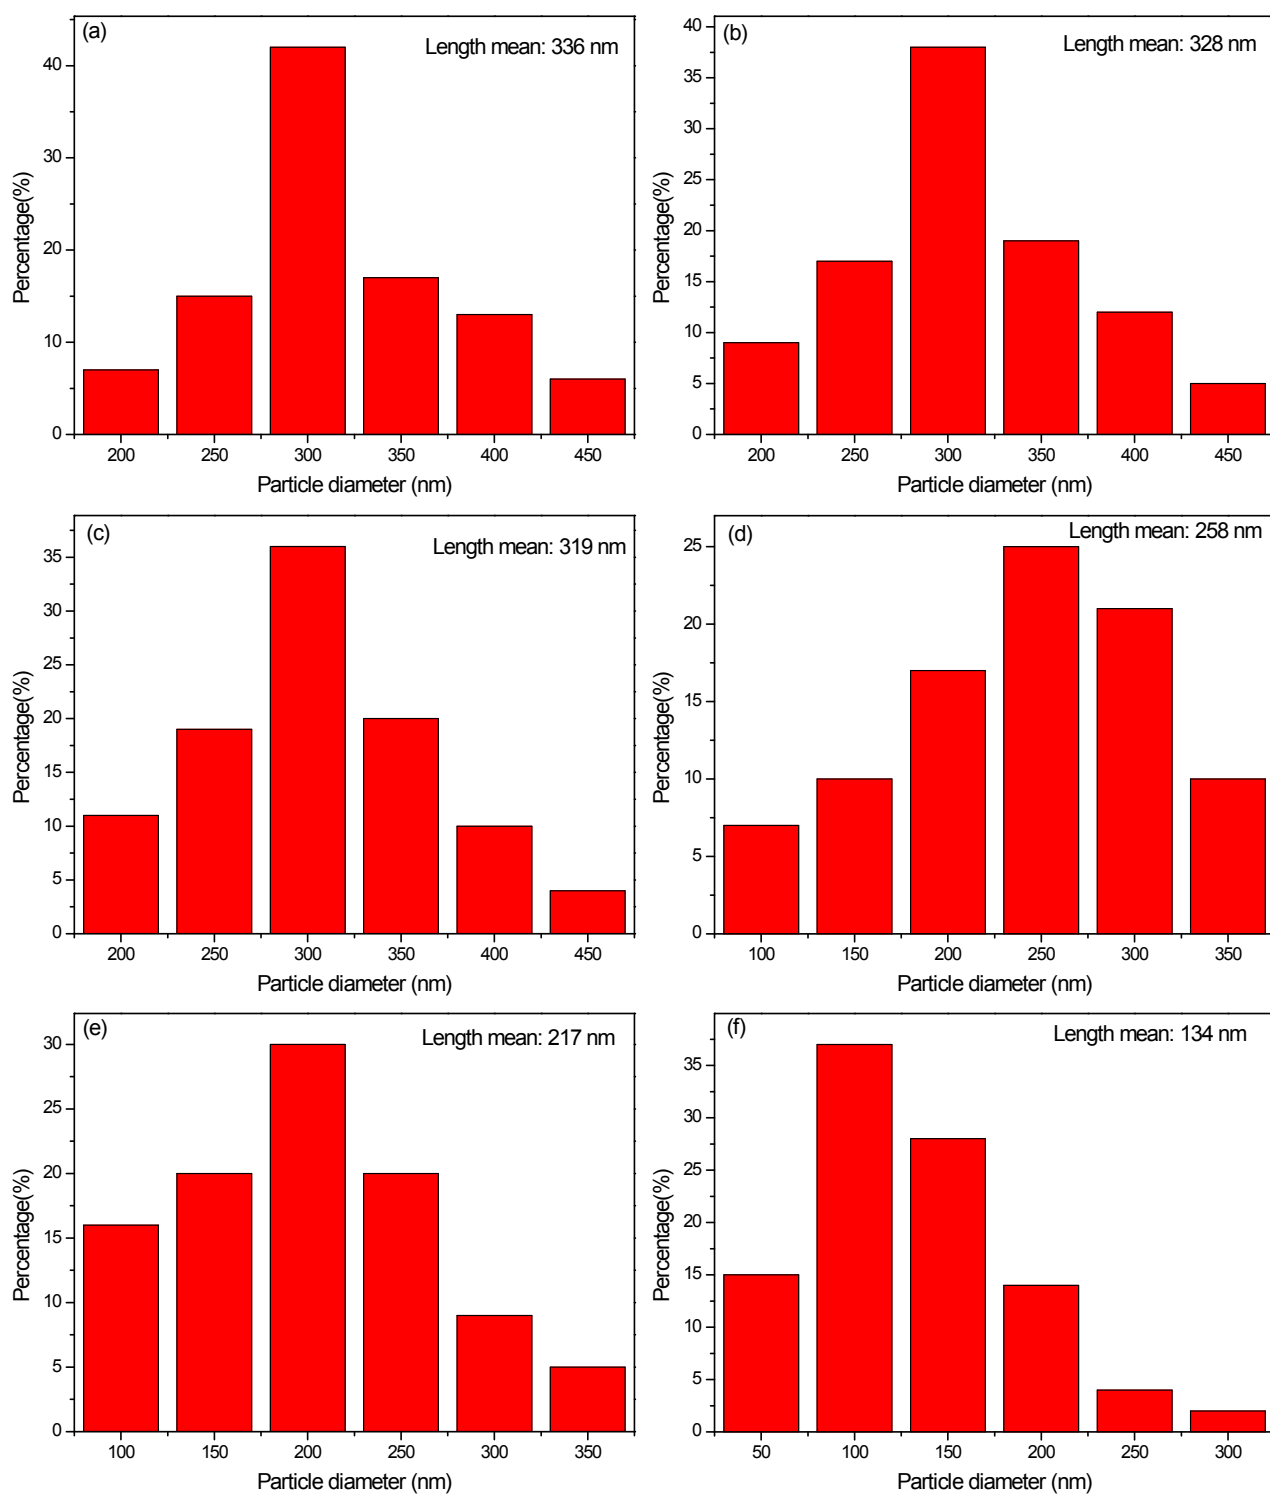

Figure S2. The histograms of length distribution corresponding to  $t\text{-(La}_{0.95-x}\text{Ca}_x\text{Eu}_{0.05})\text{VO}_4$  samples: (a)  $x=0$ , (b)  $x=0.03$ , (c)  $x=0.06$ , (d)  $x=0.09$ , (e)  $x=0.12$  and (f)  $x=0.15$ .

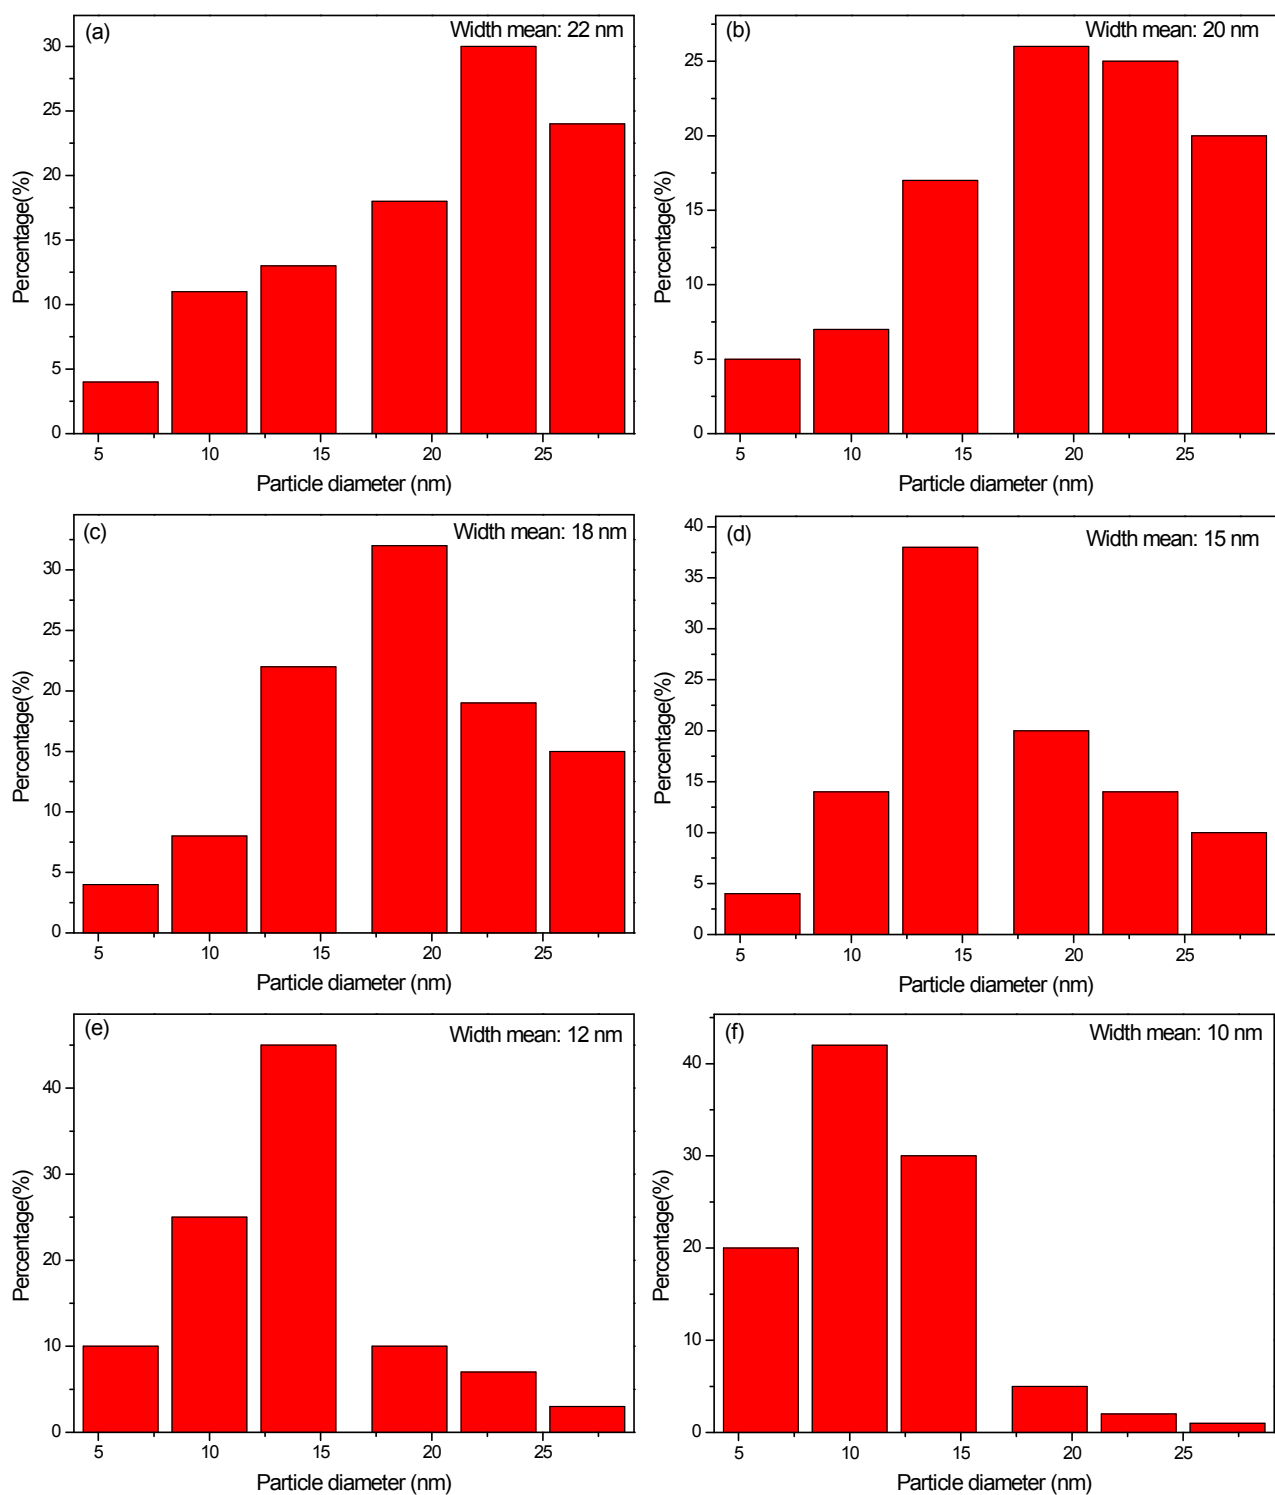

Figure S3. The histograms of width distribution corresponding to  $t\text{-(La}_{0.95-x}\text{Ca}_x\text{Eu}_{0.05})\text{VO}_4$  samples: (a)  $x=0$ , (b)  $x=0.03$ , (c)  $x=0.06$ , (d)  $x=0.09$ , (e)  $x=0.12$  and (f)  $x=0.15$ .
